# Supplementary material for: MnBr2/18-crown-6 coordination complexes showing high room temperature luminescence and quantum yield
Source: Royal Society of Chemistry journal article supplement (doi:10.1039/c6dt00458j), 2016-01-01
Supplement: c6dt00458j1.pdf [file c6dt00458j1.pdf]

# **MnBr<sub>2</sub>/(18-crown-6) Coordination Complexes Showing High Room Temperature Luminescence and Quantum Yield**

**David Hausmann, Ana Kuzmanoski, and Claus Feldmann\***

*Institut für Anorganische Chemie, Karlsruhe Institute of Technology (KIT)  
Engesserstrasse 15, D-76131 Karlsruhe, Germany  
[claus.feldmann@kit.edu](mailto:claus.feldmann@kit.edu)*

## **SUPPORTING INFORMATION**

A comparison of diffractograms that were calculated based on data from single crystal structure analysis and X-ray powder diffraction data of powder samples validates the structure of the compounds  $\text{MnBr}_2(18\text{-crown-6})$  (**1**),  $\text{Mn}_3\text{Br}_6(18\text{-crown-6})_2$  (**2**) and  $\text{Mn}_3\text{Br}_6(18\text{-crown-6})$  (**3**) (Figure S1). Certain shifts of the Bragg peaks result from the different temperatures of measurement (single crystal diffraction analysis at  $-75\text{ }^\circ\text{C}$ ; powder diffraction analysis at  $20\text{ }^\circ\text{C}$ ).

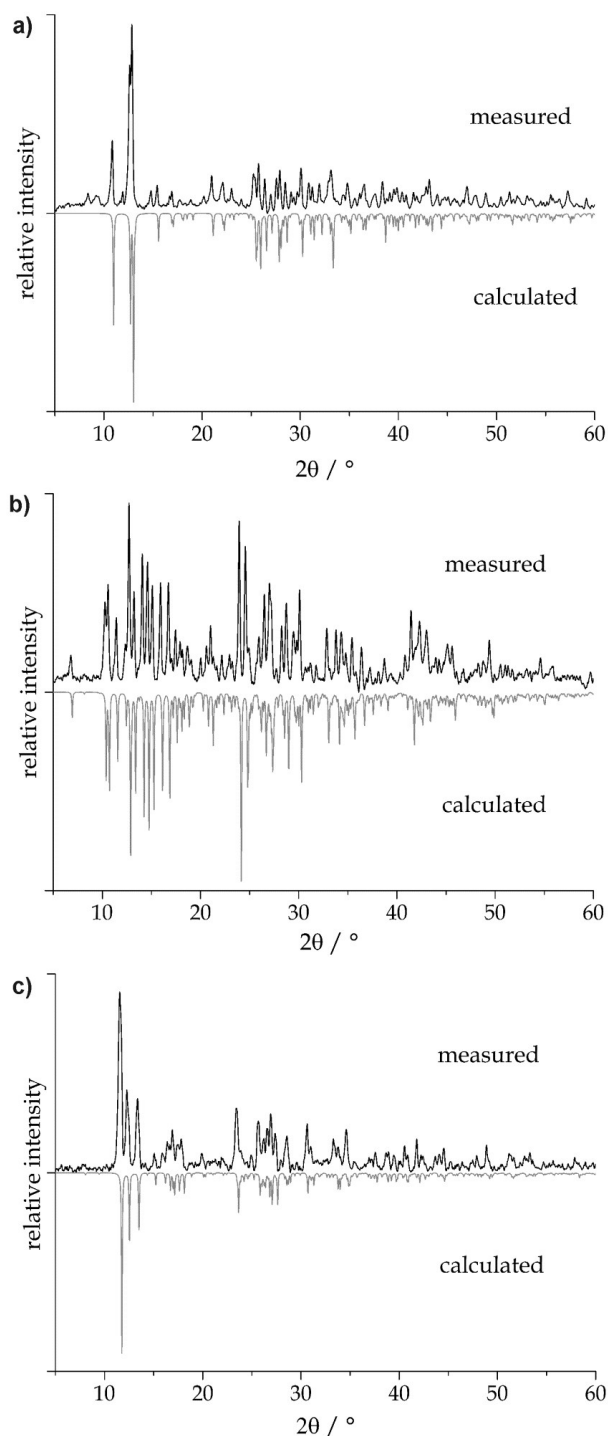

**Figure S1.** Comparison of measured (X-ray powder diffraction) and calculated (based on the data from single-crystal structure analysis) powder diffraction patterns of (a)  $\text{MnBr}_2(18\text{-crown-6})$  (**1**), (b)  $\text{Mn}_3\text{Br}_6(18\text{-crown-6})_2$  (**2**), and (c)  $\text{Mn}_3\text{Br}_6(18\text{-crown-6})$  (**3**).

Figures S2 to S4 show the packing of the building units in the crystalline lattice, which is illustrated by (2×2) unit cells for  $\text{MnBr}_2(18\text{-crown-6})$  (**1**) (Figure S2),  $\text{Mn}_3\text{Br}_6(18\text{-crown-6})_2$  (**2**) (Figure S3) and  $\text{Mn}_3\text{Br}_6(18\text{-crown-6})$  (**3**) (Figure S4).

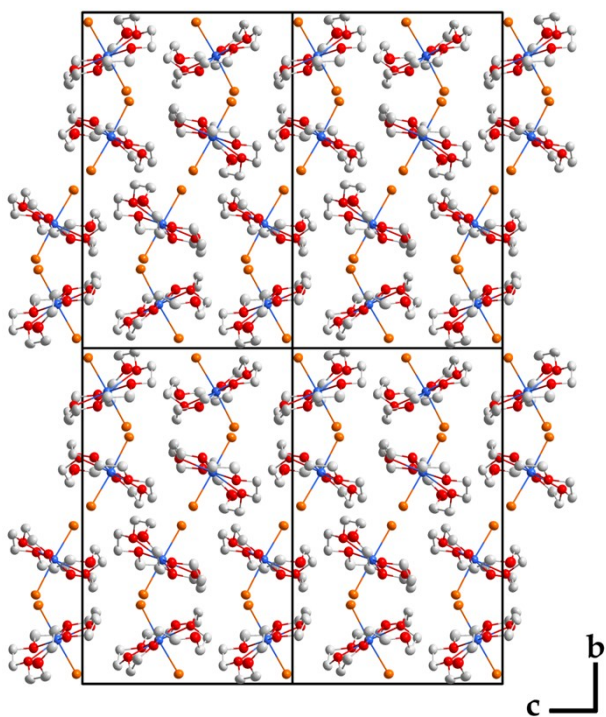

**Figure S2.** (2×2) unit cells of  $\text{MnBr}_2(18\text{-crown-6})$  (**1**) (hydrogen atoms not shown).

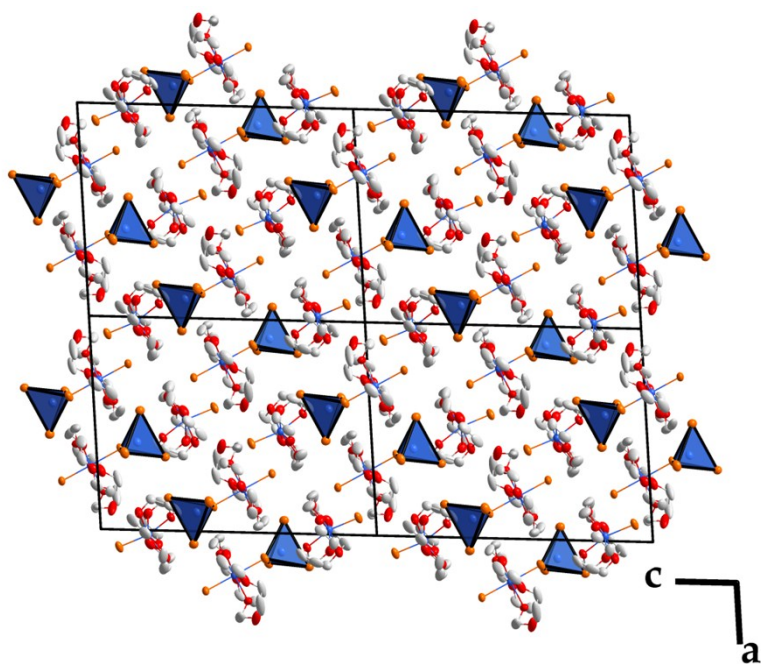

**Figure S3.** (2×2) unit cells of  $\text{Mn}_3\text{Br}_6(18\text{-crown-6})_2$  (**2**) (hydrogen atoms not shown).

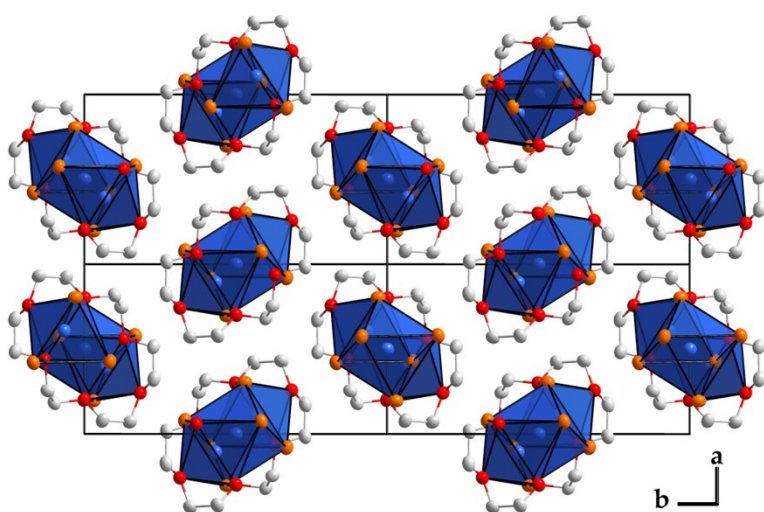

**Figure S4.** (2×2) unit cells of Mn<sub>3</sub>Br<sub>6</sub>(18-crown-6) (**3**) (hydrogen atoms not shown).
